# Supplementary material
Source: PubMed Central journal article supplement (PMC122532)

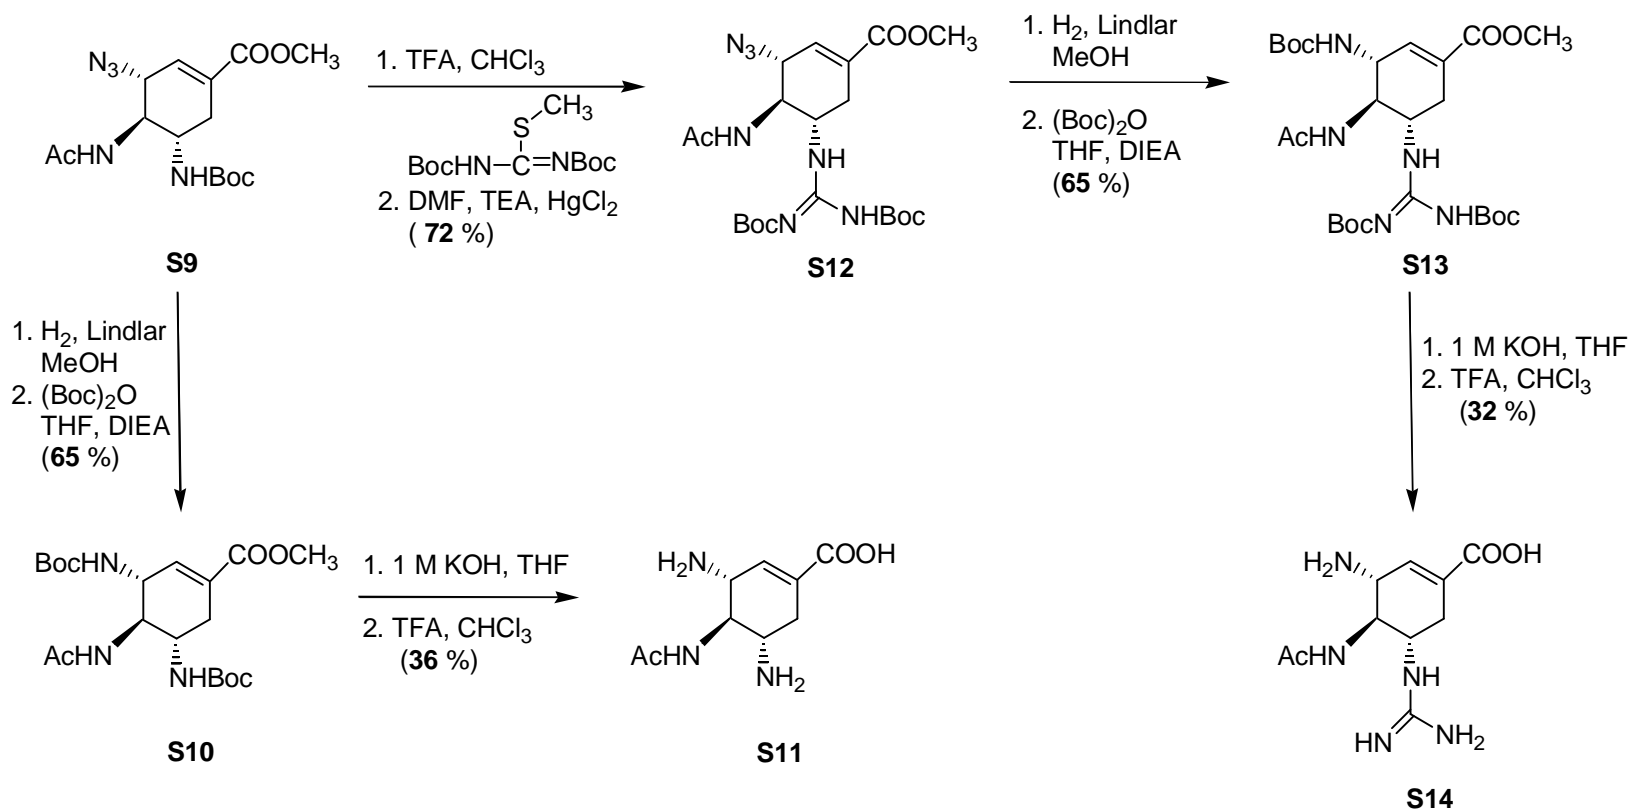

Supplement: pnas_052703799_5.pdf [file pnas_052703799_5.pdf]

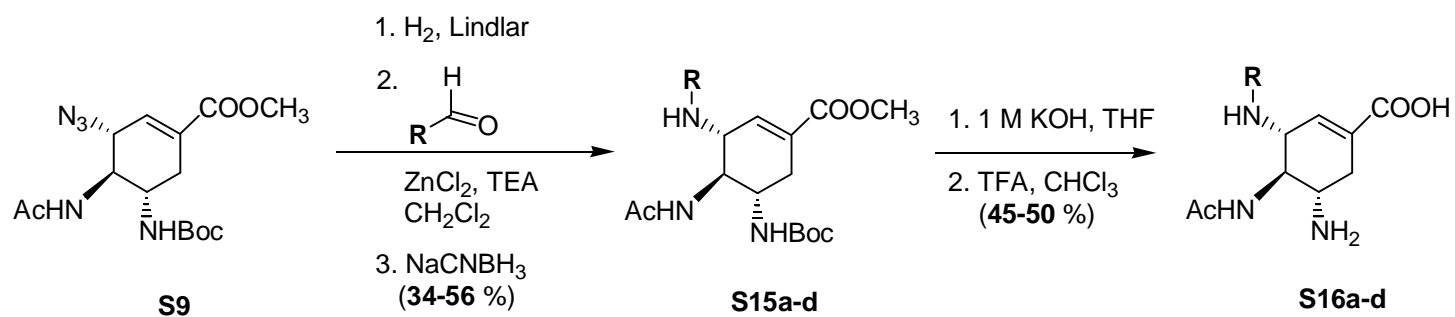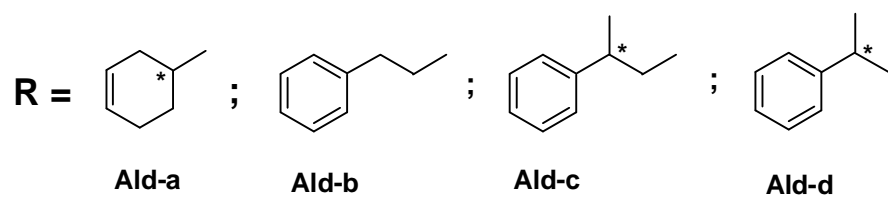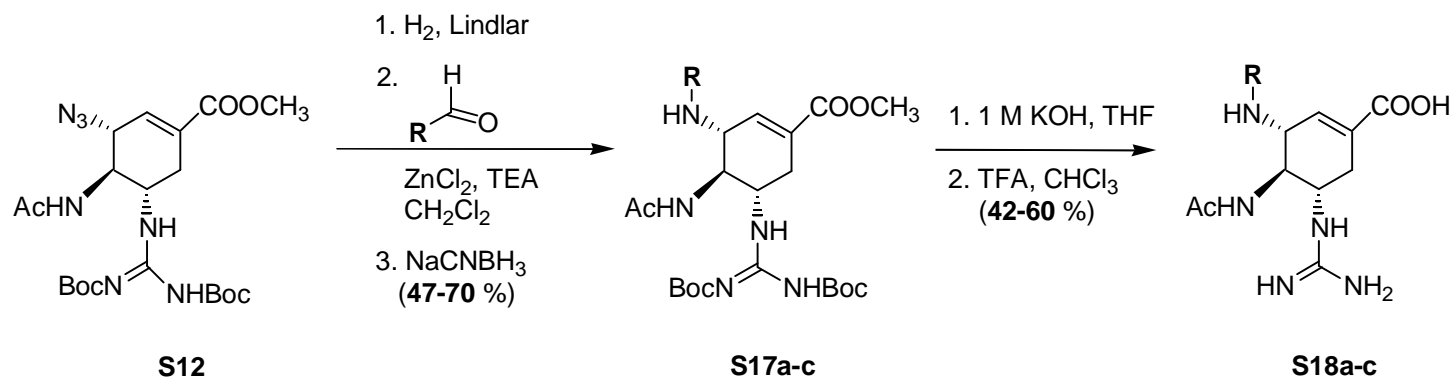

Supplement: pnas_052703799_6.pdf [file pnas_052703799_6.pdf]

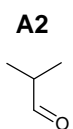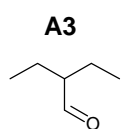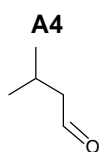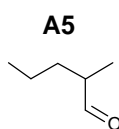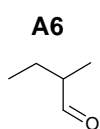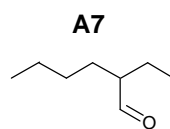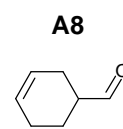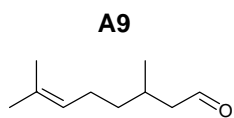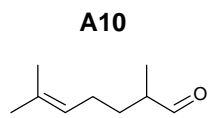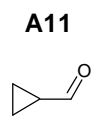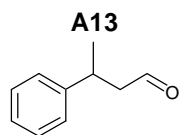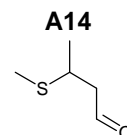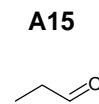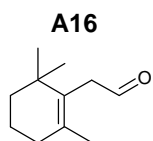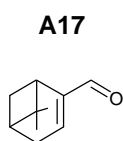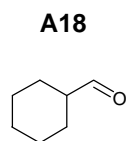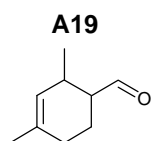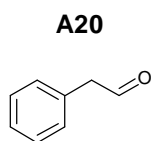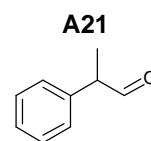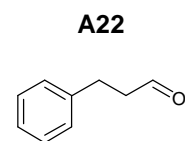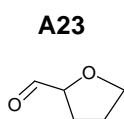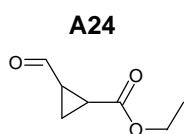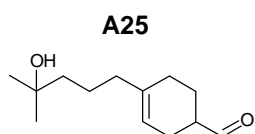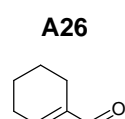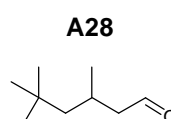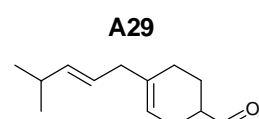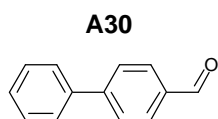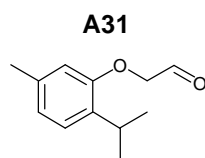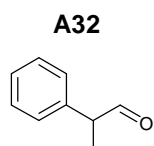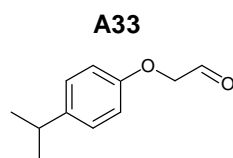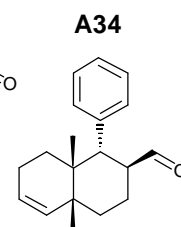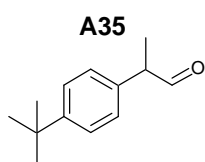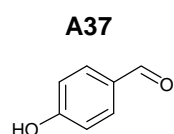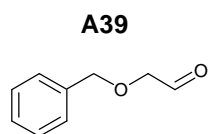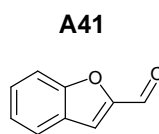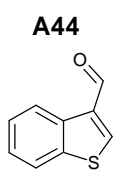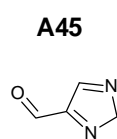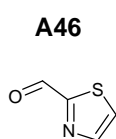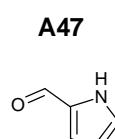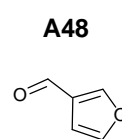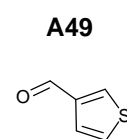

Supplement: pnas_052703799_7.pdf [file pnas_052703799_7.pdf]

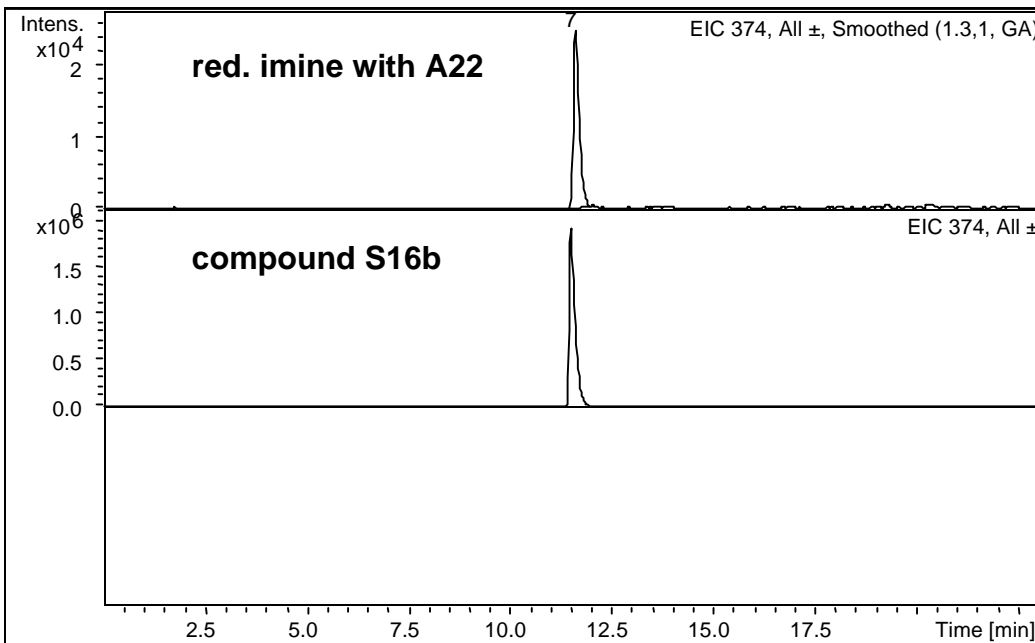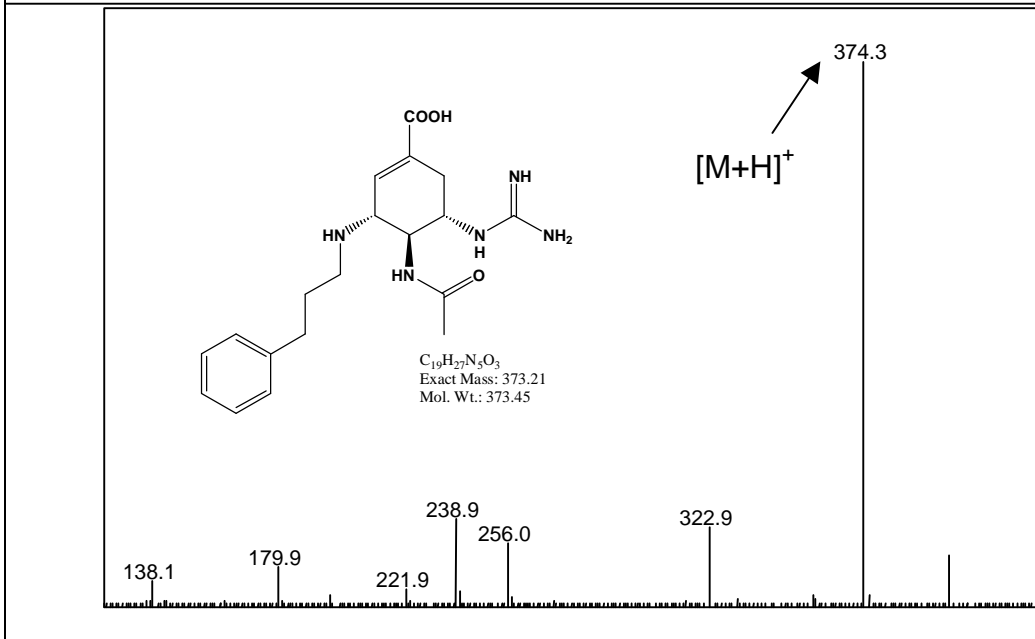

Supplement: pnas_052703799_8.pdf [file pnas_052703799_8.pdf]
